# Supplementary material for: Hydroalcoholic extract fromAbelmoschus manihot(Linn.) Medicus flower reverses sleep deprivation-evoked learning and memory deficit
Source: Royal Society of Chemistry journal article supplement (doi:10.1039/d0fo02158j), 2020-01-01
Supplement: d0fo02158j1.zip [file d0fo02158j1.zip]

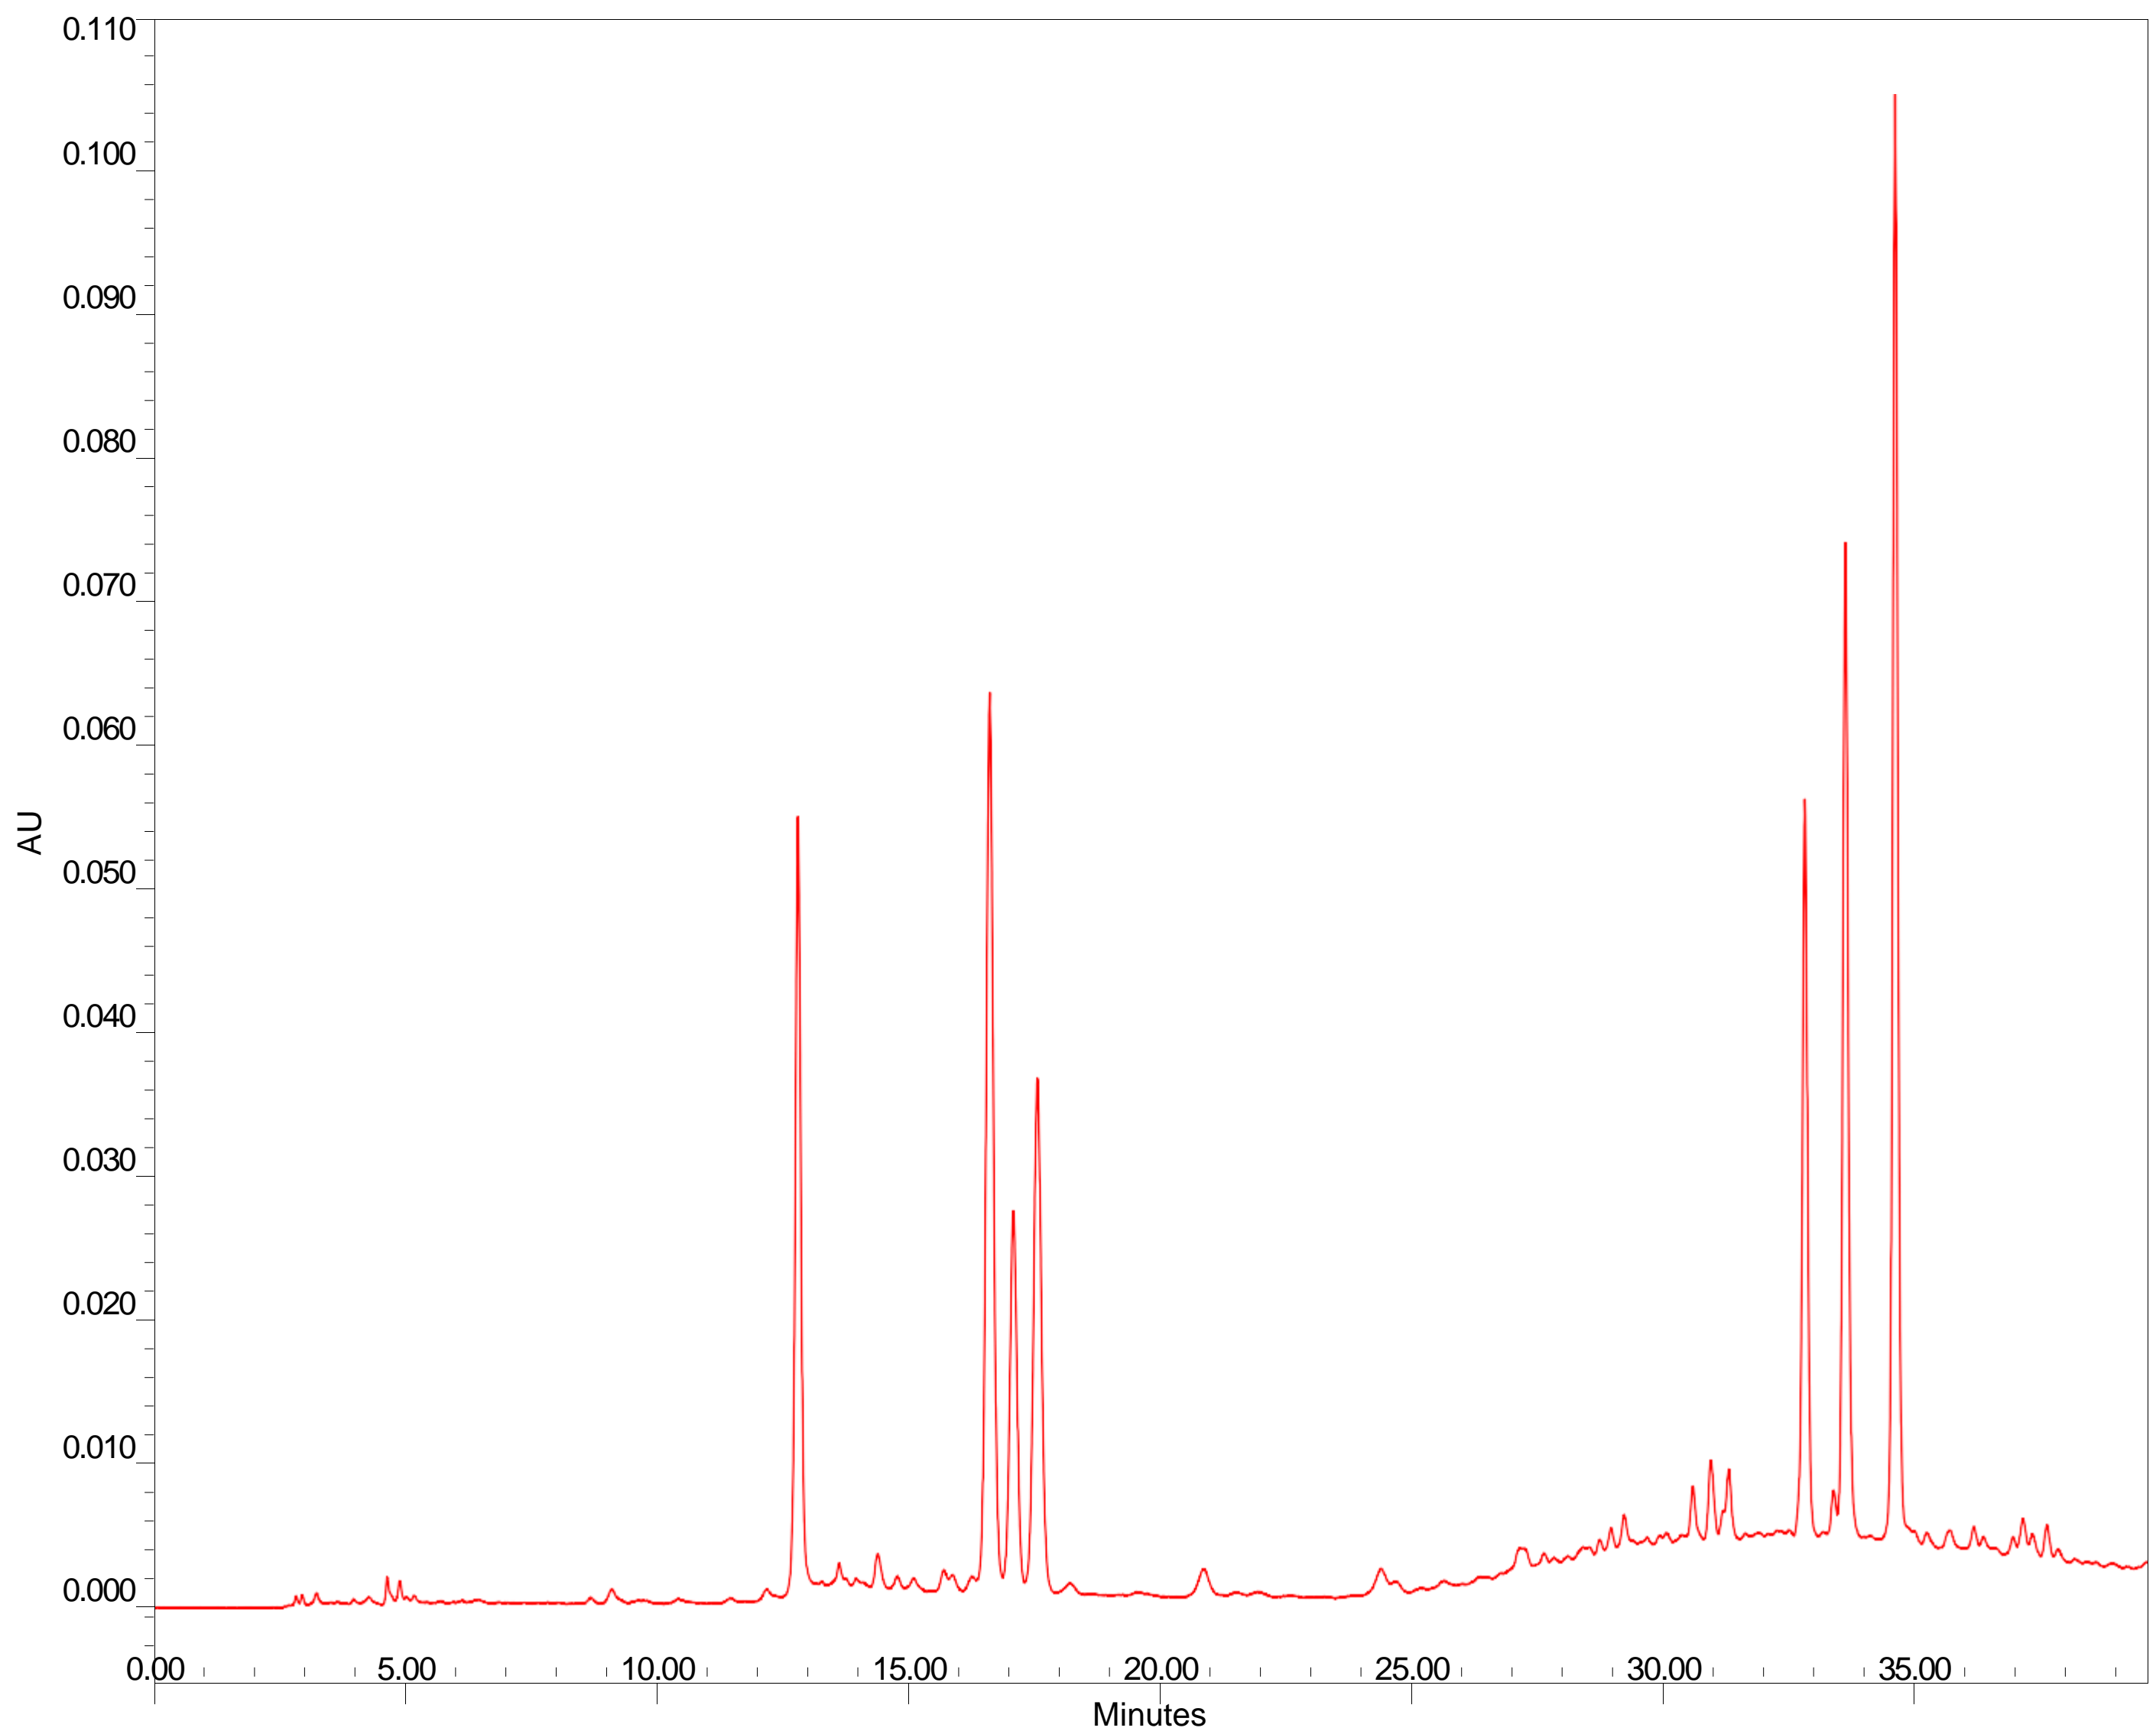

— Sample Name: EAM; Date Acquired: 2/5/2019 12:48:32 PM CST; Vial: 111; Injection: 1

## Error Log

Peak Summary w Statistics group contains information that doesn't match the data being reported.
