# Supplementary material for: Hydroalcoholic extract fromAbelmoschus manihot(Linn.) Medicus flower reverses sleep deprivation-evoked learning and memory deficit
Source: Royal Society of Chemistry journal article supplement (doi:10.1039/d0fo02158j), 2020-01-01
Supplement: d0fo02158j1.zip [file d0fo02158j1.zip]

## Sheet: DI
			Total exploration time in familiar object										Total exploration time in novel object
				Control	SD	SD+LESC	SD+MESC	SD+HESC					Control	SD	SD+LESC	SD+MESC	SD+HESC
			1	16.7	15.9	15.2	18.6	16.3				1	44.2	9.16	22.5	29.6	40.2
			2	15.89	15.6	17.4	18.7	14.9				2	40.5	11.2	19.6	33.5	41.6
			3	16.98	18.2	16.3	14.3	14.1				3	39.6	8.5	16.9	30.5	42.3
			4	18.6	17.5	14.9	15.1	15.7				4	38.5	8.1	16.3	29.6	39.6
			5	18.87	18.63	15.6	15.9	16.6				5	44.6	12.6	18.4	28.7	38.5
			6	15.42	14.98	17.7	15.5	17.1				6	43.2	13.6	18.9	36.1	44.2
			7	14.59	14.05	17.01	18.4	18.4				7	41.2	6.3	25.6	30.5	45.6
			8	15.67	15.52	18.9	18.7	14.6				8	40.9	12.1	22.1	31.4	40.2
				16.59	16.2975	16.6262	16.9	15.9625					41.5875	10.195	20.0375	31.2375	41.525
				1.51695	1.62754	1.37543	1.87388	1.42822					2.19704	2.55011	3.14504	2.4401	2.41232
			DI	Control	SD	SD+LESC	SD+MESC	SD+HESC
			1	0.45156	-0.268955	0.193634	0.228216	0.423009
			2	0.436425	-0.164179	0.0594595	0.283525	0.472566
			3	0.399788	-0.363296	0.0180723	0.361607	0.5
			4	0.348511	-0.367188	0.0448718	0.324385	0.432188
			5	0.405388	-0.193084	0.0823529	0.286996	0.397459
			6	0.4739	-0.0482855	0.0327869	0.399225	0.442088
			7	0.476967	-0.380835	0.201596	0.247444	0.425
			8	0.445996	-0.123823	0.0780488	0.253493	0.467153
				0.429817	-0.238706	0.0888527	0.298111	0.444933
				0.0431835	0.125493	0.070509	0.0594326	0.0329328

## Sheet: WB
	β-actin
	BDNF
	TrkB
	GluR1

## Sheet: table1
	Determination of representative flavonoids in extract of Abelmoschus manihot flower (EAM).
	Component	standards（ug/ml）	Standard of peak area	Sample of peak area	EAM extract（g）	content（mg/g extract）
	Rutin	13.65	510.25	636.14	0.0251	6.77998
	Hyperoside	26.14	381.48	4631.16	0.0251	126.43
	Isoquercetin	16.65	290.29	2619.54	0.0251	59.8596
	Myricetin	31.54	564.23	5366.28	0.0251	119.51
	Quercetin-3-O-glucoside	25.68	433.55	6198.35	0.0251	146.271
	Quercetin	11.31	364.16	396.81	0.0251	4.90997
	Total flavonoids
	sample: 0.0251 g of extract to 10 ml
	determination of total flavonoids content
	absorbance	rutin (ug/ml)
	0.15	1.71
	0.33	3.42
	0.41	4.55
	0.64	6.83
	0.82	9.1
	1.23	13.65
	absorbance of EAM	EAM (g)	Total flavonoids (mg/g)
	absorbance of EAM	rutin (ug/ml)		EAM (g)	Total flavonoids (mg/g)
	0.307649	3.32341		0.0217	765.763
	sample: 0.0227 g of extract to 100 ml
